# Supplementary material for: Trans ε-Viniferin Decreases Amyloid Deposits With Greater Efficiency Than Resveratrol in an Alzheimer’s Mouse Model
Source: PubMed Central journal article supplement (PMC8770934; doi:10.3389/fnins.2021.803927), 2022-01-06
Supplement: Image_1.pdf [file Image_1.pdf]

## Supplementary Figure 1

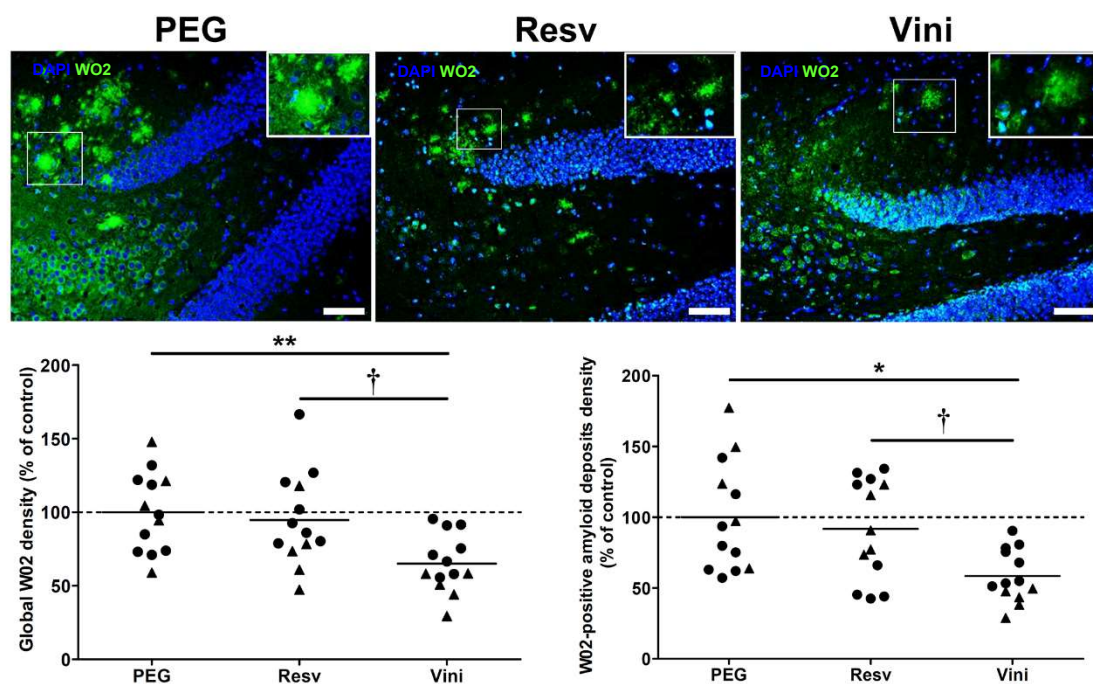

**Effects of resveratrol and viniferin on the hippocampal amyloid deposits after 9 months of treatment.** The double transgenic APP<sup>swe</sup>PS1<sup>dE9</sup> mice were intraperitoneally treated with resveratrol, *trans*  $\epsilon$ -viniferin or their vehicle (PEG 200 as control) at 20mg/kg from 3 to 12 months of age. The senile plaques were stained with antibody against amyloid peptide (clone WO2, green) and the nuclei with DAPI (blue). On each image, a magnification delineated by a white frame was added. Scale bars: 50  $\mu$ m. The quantification of global signal WO2 and of WO2-positive amyloid deposits were represented. In each graph, the dotted line represents 100% and the results were expressed as percentage of control (rounds represent females and triangles represent males). To compare values between PEG- and polyphenol-treated-mice (by *trans* resveratrol or *trans*  $\epsilon$ -viniferin), a Kruskal-Wallis test followed by Dunn's Multiple Comparison Test were used, (n = 13). \*\*p < 0.01, \*p < 0.05 compared to PEG-treated AD mice (control mice) and †p < 0.05 compared to resveratrol-treated mice.
