# Supplementary material for: Trans ε-Viniferin Decreases Amyloid Deposits With Greater Efficiency Than Resveratrol in an Alzheimer’s Mouse Model
Source: PubMed Central journal article supplement (PMC8770934; doi:10.3389/fnins.2021.803927), 2022-01-06
Supplement: Image_4.pdf [file Image_4.pdf]

## Supplementary Figure 4

### Original blots of Figure 2C

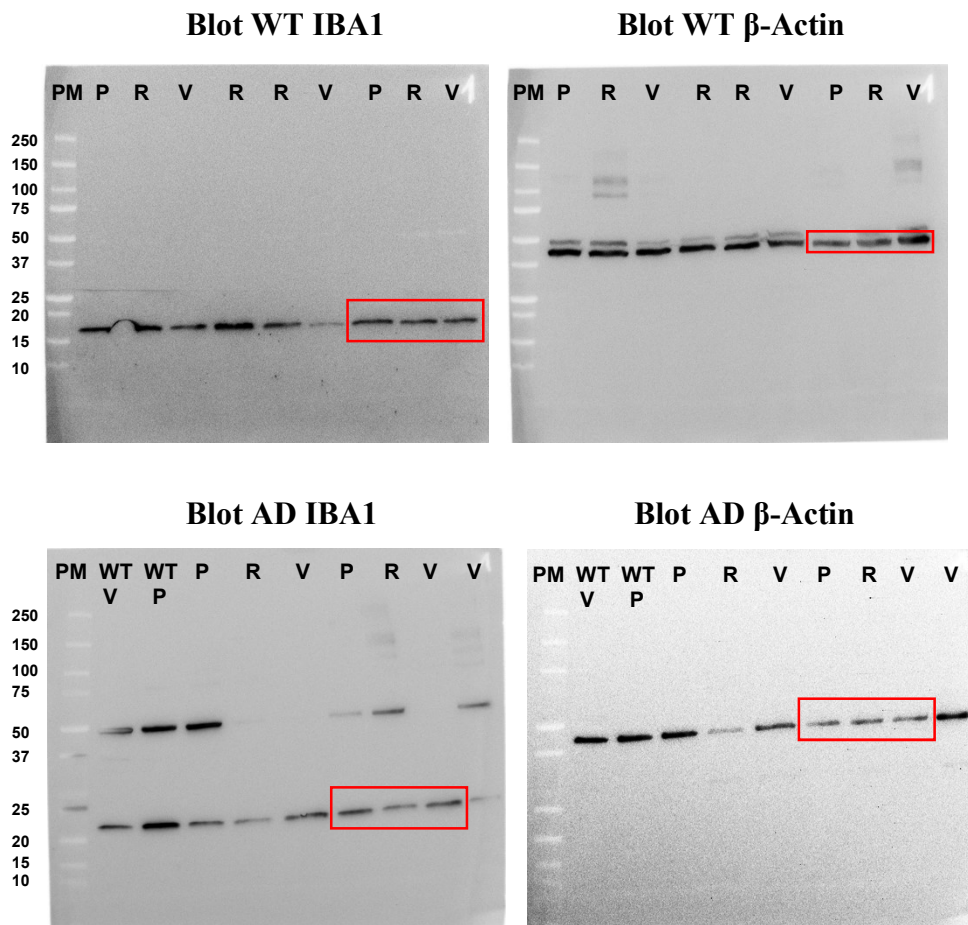

PM: kDa

WT: Wild-type (other wells loaded with AD samples)

P: PEG treatment

R: Resveratrol treatment

V: Viniferin treatment

**Original blots of Figure 3B**

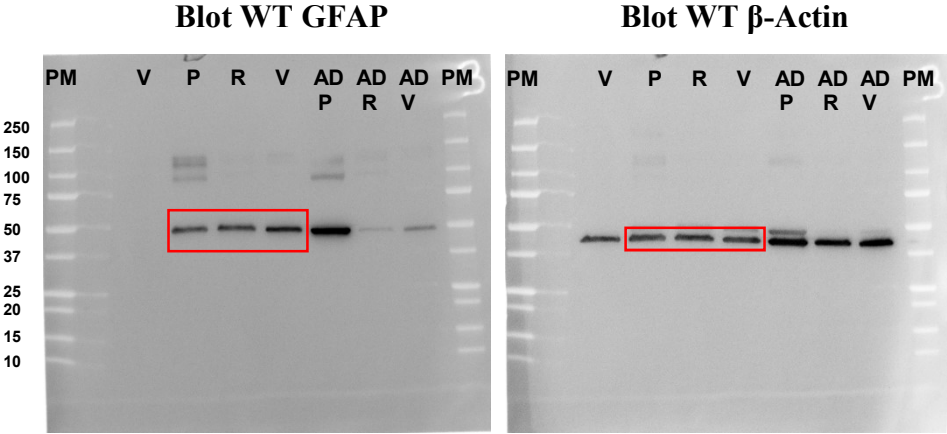

AD: Alzheimer’s disease (other wells loaded with WT samples)

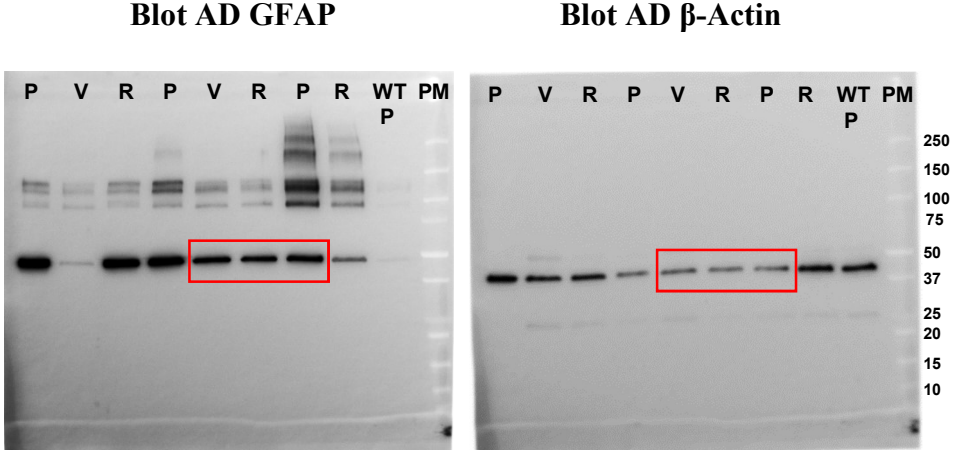

- PM: kDa
- WT: Wild-type (other wells loaded with AD samples)
- P: PEG treatment
- R: Resveratrol treatment
- V: Viniferin treatment

### Original blots of Supplementary Figure 2B

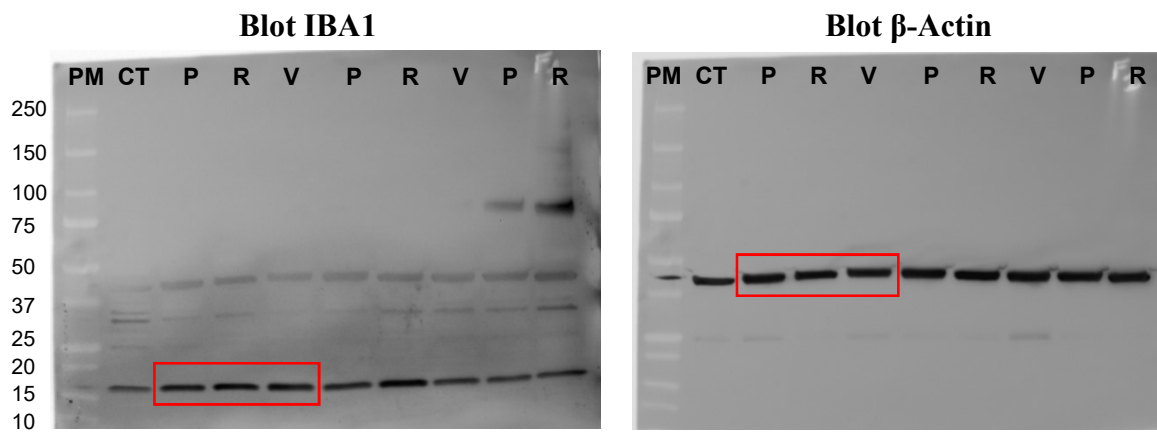

PM: kDa

CT: positive control

P: PEG treatment

R: Resveratrol treatment

V: Viniferin treatment

### Original blots of Supplementary Figure 2C

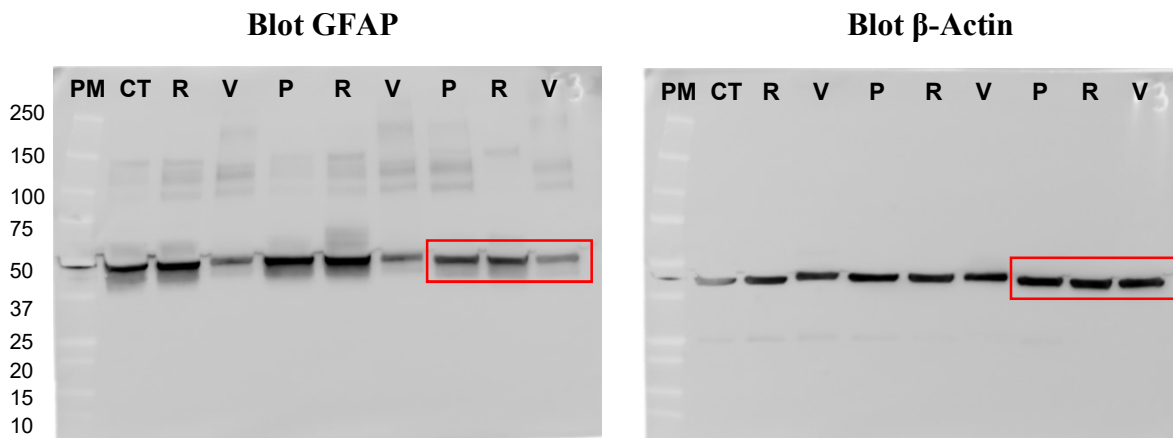

PM: kDa

CT: positive control

P: PEG treatment

R: Resveratrol treatment

V: Viniferin treatment
