# Supplementary material for: Trans ε-Viniferin Decreases Amyloid Deposits With Greater Efficiency Than Resveratrol in an Alzheimer’s Mouse Model
Source: PubMed Central journal article supplement (PMC8770934; doi:10.3389/fnins.2021.803927), 2022-01-06
Supplement: Table_1.pdf [file Table_1.pdf]

**Supplementary Table 1: Chemical products used in the current study.**

| <b>Chemical product</b>                                                                                                                                                                                                                | <b>Company</b>                                                    |
|----------------------------------------------------------------------------------------------------------------------------------------------------------------------------------------------------------------------------------------|-------------------------------------------------------------------|
| Sodium fluoride (NaF), Phenylmethylsulfonyl fluoride (PMSF), Protease and phosphatase inhibitor cocktails, Dithiothreitol (DTT), Paraformaldehyde (PFA), 4',6-diamidino-2-phenylindole (DAPI), all reagent-grade chemicals for buffers | Sigma (St Quentin Fallavier, France)                              |
| Ketamidol® (Ketamine) and 2% Rompun® (Xylazine)                                                                                                                                                                                        | Coveto (Montaigu, France)                                         |
| Protease-Free Bovine Serum Albumin (BSA)                                                                                                                                                                                               | Jackson ImmunoResearch Europe Ltd (Interchim distributor, France) |
| Laemmli Sample Buffer, 4-20% Tris-Glycine gels, Tris-Glycine SDS Running Buffer, Precision plus protein™ standards All blue, Protein Assay Dye Reagent Concentrate                                                                     | Bio-rad (Marnes-la Coquette, France)                              |
| Amyloid ELISA kit                                                                                                                                                                                                                      | Gibco-Invitrogen (Fisher Bioblock Scientific distributor, France) |
| Guanidine                                                                                                                                                                                                                              | Acros Organics (USA)                                              |
| Absolute ethanol                                                                                                                                                                                                                       | Carlo Erba Reagents Rodano (France)                               |
| Histosol plus                                                                                                                                                                                                                          | Shandon (France)                                                  |
| <i>Trans</i> $\epsilon$ -viniferin and <i>trans</i> -resveratrol                                                                                                                                                                       | Locally extracted and purified                                    |
| Mouse antibody anti amyloid peptide (clone W02), Chemiluminescence Luminata Forte and Classico Substrates                                                                                                                              | Millipore (Saint-Quentin-en- Yvelines, France)                    |
| Rabbit antibody anti GFAP, Donkey antibody anti goat IgG-HRP, Goat antibody anti rabbit IgG-HRP, Horse antibody anti mouse IgG-HRP                                                                                                     | Cell Signaling Technology (Ozyme, France)                         |
| Goat antibody anti IBA-1                                                                                                                                                                                                               | Abcam (France)                                                    |
| Mouse antibody anti $\beta$ -actin                                                                                                                                                                                                     | Sigma Aldrich (Merck-Millipore, France)                           |
| Donkey antibodies anti-mouse-Alexa 488, anti-rabbit-RRX, anti-goat RRX                                                                                                                                                                 | Jackson ImmunoResearch Europe Ltd (Interchim distributor, France) |
