# Supplementary material for: Trans ε-Viniferin Decreases Amyloid Deposits With Greater Efficiency Than Resveratrol in an Alzheimer’s Mouse Model
Source: PubMed Central journal article supplement (PMC8770934; doi:10.3389/fnins.2021.803927), 2022-01-06
Supplement: Table_2.pdf [file Table_2.pdf]

**Supplementary Table 2: Primary and secondary antibodies used in the study.**

| <i>Primary antibodies</i>              |                        |                        |                           |
|----------------------------------------|------------------------|------------------------|---------------------------|
| <b>Antibodies</b>                      | <b>Dilution for WB</b> | <b>Dilution for IF</b> | <b>Sources</b>            |
| Mouse anti amyloid peptide (clone W02) | /                      | 1:100                  | Millipore                 |
| Rabbit anti GFAP                       | 1:1000                 | 1:100                  | Cell signaling            |
| Goat anti IBA-1                        | 1:500                  | 1:100                  | Abcam                     |
| Mouse anti $\beta$ -actin              | 1:10000                | /                      | Sigma Aldrich             |
| <i>Secondary antibodies</i>            |                        |                        |                           |
| <b>Antibodies</b>                      | <b>Dilution for WB</b> | <b>Dilution for IF</b> | <b>Sources</b>            |
| Donkey anti-mouse-Alexa 488            | /                      | 1:50                   | Jackson immunoresearch    |
| Donkey anti-rabbit-RRX                 | /                      | 1:50                   | Jackson immunoresearch    |
| Donkey anti-goat RRX                   | /                      | 1:50                   | Jackson immunoresearch    |
| Donkey anti goat IgG-HRP               | 1:1000                 | /                      | Santa cruz                |
| Goat anti rabbit IgG-HRP               | 1:1000                 | /                      | Cell Signaling Technology |
| Horse anti mouse IgG-HRP               | 1:1000                 | /                      | Cell Signaling Technology |
| <i>Primary antibodies</i>              |                        |                        |                           |
| <b>Antibodies</b>                      | <b>Dilution for WB</b> | <b>Dilution for IF</b> | <b>Sources</b>            |
| Mouse anti amyloid peptide (clone W02) | /                      | 1:100                  | Millipore                 |
| Rabbit anti GFAP                       | 1:1000                 | 1:100                  | Cell signaling            |
| Goat anti IBA-1                        | 1:500                  | 1:100                  | Abcam                     |
| Mouse anti $\beta$ -actin              | 1:10000                | /                      | Sigma Aldrich             |
| <i>Secondary antibodies</i>            |                        |                        |                           |
| <b>Antibodies</b>                      | <b>Dilution for WB</b> | <b>Dilution for IF</b> | <b>Sources</b>            |
| Donkey anti-mouse-Alexa 488            | /                      | 1:50                   | Jackson immunoresearch    |
| Donkey anti-rabbit-RRX                 | /                      | 1:50                   | Jackson immunoresearch    |
| Donkey anti-goat RRX                   | /                      | 1:50                   | Jackson immunoresearch    |
| Donkey anti goat IgG-HRP               | 1:1000                 | /                      | Santa cruz                |
| Goat anti rabbit IgG-HRP               | 1:1000                 | /                      | Cell Signaling Technology |
| Horse anti mouse IgG-HRP               | 1:1000                 | /                      | Cell Signaling Technology |
